# Psychiatric Services

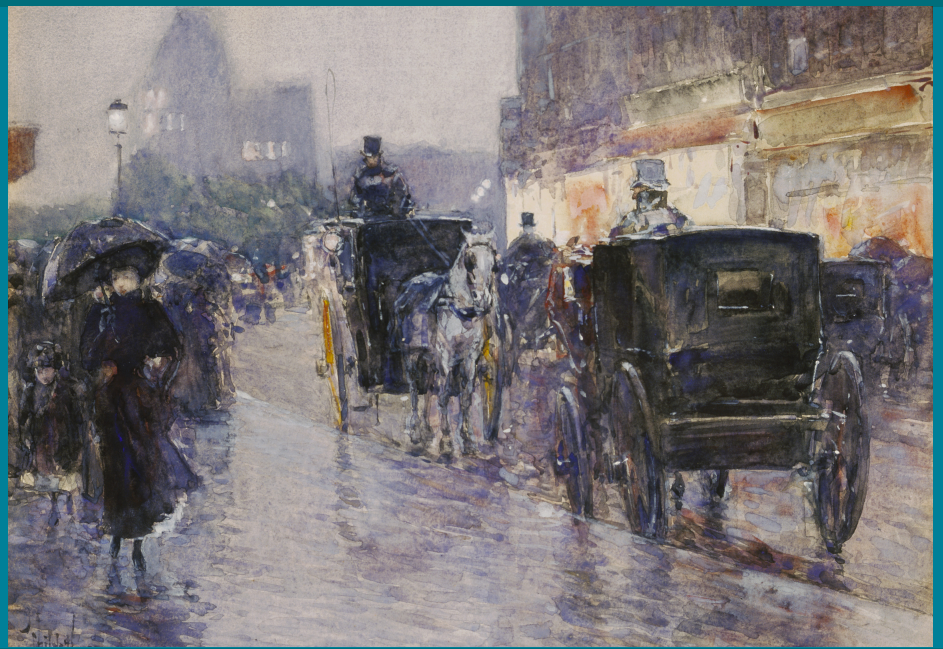

Practice-based research networks and “learning health care systems”

Illness self-management programs for adults with serious mental illness

Improving employment outcomes with virtual reality job interview training

Preventing deaths from unintentional opioid overdoses by veterans
