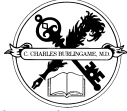

We are pleased to announce that  
**DAVID A. BRENT, M.D.**  
 is the 2015 recipient of the  
**C. CHARLES BURLINGAME, M.D. AWARD**  
 for his outstanding contributions to psychiatry.

**Past Recipients**

- 1988 Robert Kellner, M.D., Ph.D.
- 1989 William T. Carpenter, Jr., M.D.
- 1990 Dennis P. Cantwell, M.D.
- 1991 George E. Vaillant, M.D.
- 1992 A. John Rush, M.D.
- 1993 John C. Nemiah, M.D.
- 1994 Maurice J. Martin, M.D.
- 1995 Otto F. Kernberg, M.D.
- 1996 Charles P. O'Brien, M.D., Ph.D.
- 1997 Glen Owen Gabbard, M.D.
- 1998 Lissy F. Jarvik, M.D., Ph.D.
- 1999 Nancy C. Andreasen, M.D., Ph.D.
- 2000 Lewis L. Judd, M.D.
- 2001 Paul S. Appelbaum, M.D.
- 2002 Charles B. Nemeroff, M.D., Ph.D.
- 2003 Dilip V. Jeste, M.D.
- 2004 David H. Barlow, Ph.D.
- 2005 Herbert D. Kleber, M.D.
- 2006 Daniel N. Stern, M.D.
- 2007 Jerrold F. Rosenbaum, M.D.
- 2008 K. Ranga Rama Krishnan, M.D.
- 2009 David J. Kupfer, M.D.
- 2010 Professor Sir Michael Rutter
- 2011 Jeffrey A. Lieberman, M.D.
- 2012 Judith L. Rapoport, M.D.
- 2013 Nora D. Volkow, M.D.
- 2014 Daniel R. Weinberger, M.D.

**Institute  
 of Living**  
 A Division of Hartford Hospital

200 Retreat Avenue  
 Hartford, CT 06106  
 1-800-673-2411

# Leading the way

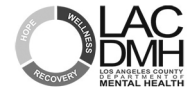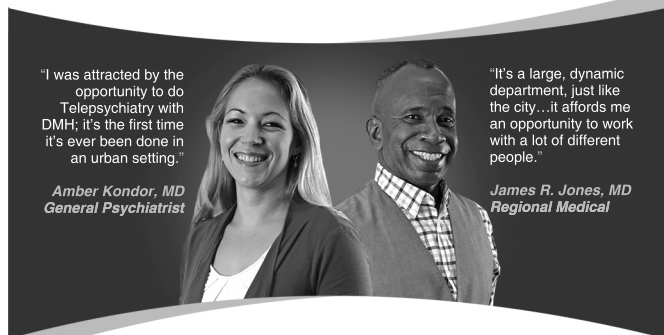

"I was attracted by the opportunity to do Telepsychiatry with DMH; it's the first time it's ever been done in an urban setting."

*Amber Kondor, MD  
 General Psychiatrist*

"It's a large, dynamic department, just like the city...it affords me an opportunity to work with a lot of different people."

*James R. Jones, MD  
 Regional Medical*

Join the largest, most dynamic mental health department in the nation. We are creating the future of mental health services, and we are seeking physicians who are ready to join our team and push the boundaries of traditional community practice.

To learn more about employment as a psychiatrist with the Los Angeles County Department of Mental Health, including salary and benefits, please visit:

[www.psychiatristjobs.la](http://www.psychiatristjobs.la)

**Psychiatric Services** (ISSN |1075-2730; online version, 1557-9700) is published monthly by the American Psychiatric Association, editorial and executive office, 1000 Wilson Blvd., Suite 1825, Arlington, VA 22209-3901. Copyright © 2015 by the American Psychiatric Association. Printed in U.S.A. Periodicals postage paid at Arlington, VA, and at additional mailing offices. POSTMASTER: Send address changes to **Psychiatric Services, 1000 Wilson Blvd., Suite 1825, Arlington, VA 22209-3901.**

**Orlando VA Medical Center** is seeking a full-time Psychiatry Residency Training Site Director.

The ideal candidate has experience in, and a passion for, medical education and is eligible for a faculty appointment at the Assistant, Associate, or full Professor level. The position includes direct patient care, resident precepting, student teaching, and active development, implementation, and oversight of an academic curriculum as well as a program of faculty development.

The Orlando VA Mental Health Service is building a robust inter-professional academic environment and has established institutional training affiliations with Nova Southeastern University College of Osteopathic Medicine, the University of Central Florida College of Medicine, and Florida Hospital.

The Orlando VAMC, in the heart of Medical City, provides a wealth of collaborative academic opportunities since the location is in close proximity to UCF College of Medicine, Nemours Children's Hospital, the Sanford-Burnham Medical Institute.

Please contact  
**Silvana Montautti, M.D.**  
**Silvana.Montautti@va.gov**

# Essential New Titles on Addiction Psychiatry

NEW!

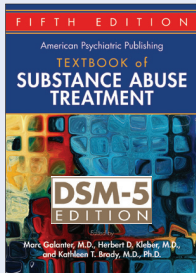

## The American Psychiatric Publishing Textbook of Substance Abuse Treatment

Edited by Marc Galanter, M.D., Herbert D. Kleber, M.D., and Kathleen T. Brady, M.D., Ph.D.

No other text available today offers what *The American Psychiatric Publishing Textbook of Substance Abuse Treatment* can: completely updated treatment information on a broad range of substance use disorders that is consistent with the new DSM-5 classification and thus reflective of how psychiatry is practiced today. Designed for researchers and mental health professionals ranging from trainee to licensed practitioner, the book is also appropriate for a diverse array of rehabilitation settings, from inpatient to community-based treatment. Full coverage is provided on 12-step programs, as well, including the latest outcomes research.

2015 • 925 pages • ISBN 978-1-58562-472-0 • Hardcover • \$199.00 • Item #62472

## Study Guide to Substance Abuse Treatment

*A Companion to The American Psychiatric Publishing Textbook of Substance Abuse Treatment, Fifth Edition*

Philip R. Muskin, M.D.

This book is a question-and-answer companion that allows you to evaluate your mastery of the subject matter as you progress through *The American Psychiatric Publishing Textbook of Substance Abuse Treatment, Fifth Edition*. The *Study Guide* is made up of questions divided into individual quizzes of 10-20 questions each that correspond to the chapters in the *Textbook*. Each answer is accompanied by a discussion that addresses the correct response.

2016 • 475 pages • ISBN 978-1-58562-511-6 • Paperback • \$59.00 • Item #62511

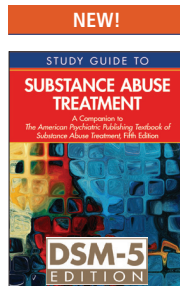

NEW!

## The Behavioral Addictions

Edited by Michael S. Ascher, M.D., and Petros Levounis, M.D., M.A.

*The Behavioral Addictions* provides a pragmatic and engaging guide to help clinicians understand and contextualize conditions that may not be clearly delineated in the DSM-5 diagnostic system. Although not accorded a specific classification, the behaviors addressed in this book share the accepted hallmarks of addiction—continued engagement in an action despite negative consequences and loss of control over one's own life. The editors begin with an overview of the behavioral addictions and then present 12 case studies focused on a variety of behaviors.

2015 • 235 pages • ISBN 978-1-58562-485-0 • Paperback • \$59.00 • Item #62485

Video Illustrated

NEW!

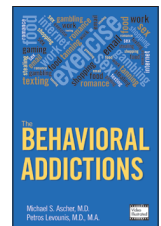

DSM-5 EDITION

## Clinical Manual of Addiction Psychopharmacology, Second Edition

Edited by Henry R. Kranzler, M.D., Domenic A. Ciraulo, M.D., and Leah R. Zindel, R.Ph., M.A.L.S.

This new edition offers current information on the pharmacology of the major classes of drugs related to addiction, as well as the latest pharmacological treatment of dependence on these drugs. Advances have been made in the treatment of opioid, alcohol, and in particular tobacco dependence; and these chapters have been thoroughly updated accordingly. Prescribing clinicians, and other mental health practitioners will find this book invaluable in their work with individuals with substance-related disorders.

2014 • 463 pages • ISBN 978-1-58562-440-9 • Paperback • \$75.00 • Item #62440

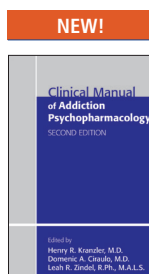

NEW!

## The Addiction Casebook

Edited by Petros Levounis, M.D., M.A., and Abigail J. Herron, D.O.

The book consists of 13 clinical cases that exemplify DSM-5 addiction diagnoses commonly encountered in clinical practice. It lays out realistic and effective strategies to diagnose and treat patients with addictions ranging from alcohol and caffeine to gambling and problematic Internet use and includes multiple-answer questions at the end of each chapter designed to strengthen readers' knowledge. The contemporary, topical suggestions found in *The Addiction Casebook* will be useful to general psychiatrists, medical students, and allied professionals alike.

2014 • 230 pages • ISBN 978-1-58562-458-4 • Paperback • \$65.00 • Item #62458

NEW!

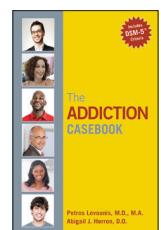

AMERICAN  
PSYCHIATRIC  
ASSOCIATION  
PUBLISHING

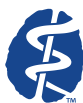

[www.appi.org](http://www.appi.org)

Email: [appi@psych.org](mailto:appi@psych.org)

Toll Free: 1-800-368-5777

20% Discount for American Psychiatric Association Members

25% Discount for APA Resident-Fellow Members

Please use Priority Code AH1503 when ordering.
