# CALL FOR APPLICATIONS TO THE 2016 RESEARCH COLLOQUIUM FOR JUNIOR INVESTIGATORS

AMERICAN  
PSYCHIATRIC  
ASSOCIATION  
FOUNDATION

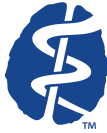

**SUNDAY,  
MAY 15, 2016  
8:00a.m.-5:00p.m.  
Omni Atlanta Hotel  
At CNN Center**

**Questions?  
colloquium@psych.org**

## ATTENTION PSYCHIATRIC RESIDENTS, FELLOWS, JUNIOR FACULTY

The **Research Colloquium** is accepting applications for the 2016 meeting in Atlanta, Georgia, held in conjunction with the annual meeting of the American Psychiatric Association. MDs who are senior residents, fellows, or junior faculty in psychiatry are eligible to apply.

Successful applicants will receive \$1,000 travel stipends to discuss their research in a small group setting with distinguished senior leaders in psychiatric research.

The Colloquium provides a one-day, immersive, research experience for junior investigators in the early phases of their training in psychiatry. It represents an important opportunity for mentorship, guidance, information on research career development and grantsmanship, and networking.

**Deadline: December 15, 2015**

Pre-application technical assistance is available.

Eligibility details and application packet: <http://psychiatry.org/psychiatrists/practice/research/research-colloquium>

**YOUR 2015 APA  
MEMBERSHIP EXPIRES  
DECEMBER 31, 2015.**

Don't wait till the last minute.

Renew your  
membership for  
2016 TODAY at  
[psychiatry.org/paydues](http://psychiatry.org/paydues)

Or call APA Member  
Services:

703-907-7300 or  
1-888-357-7924

and ask us about Scheduled  
Payment Plan to pay your  
dues in installments.

AMERICAN  
PSYCHIATRIC  
ASSOCIATION

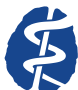

Source: https://psychiatryonline.org/doi/suppl/10.1176/ps.2015.66.issue-11/suppl_file/front.pdf
